# Supplementary material for: The Pharmacy of the Future: Pharmacy Professionals’ Perceptions and Contributions Regarding New Services in Community Pharmacies
Source: MDPI journal article supplement (doi:10.3390/healthcare11182580), 2023-09-18
Supplement: s1 [file s1]

**Table S1.** Questionnaire applied to participants

|                                                                                                         |                         |          |                           |       |               |
|---------------------------------------------------------------------------------------------------------|-------------------------|----------|---------------------------|-------|---------------|
| <b>Sociodemographic questions</b>                                                                       |                         |          |                           |       |               |
| Age                                                                                                     | District                |          |                           |       |               |
| Gender                                                                                                  | Degree                  |          |                           |       |               |
| Years of experience                                                                                     |                         |          |                           |       |               |
| <b>Questionnaire for perception assessment</b>                                                          |                         |          |                           |       |               |
| <b>Items</b>                                                                                            | <b>Response Options</b> |          |                           |       |               |
| <b>Overall, the role of community pharmacies involves:</b>                                              | Totally Disagree        | Disagree | Neither Agree or Disagree | Agree | Totally Agree |
| <i>Evaluate the patient/client's complaint(s)</i>                                                       |                         |          |                           |       |               |
| <i>Evaluate therapeutic adherence.</i>                                                                  |                         |          |                           |       |               |
| <i>Evaluate/Measure physiological parameters</i>                                                        |                         |          |                           |       |               |
| <i>Refer to a specialized doctor.</i>                                                                   |                         |          |                           |       |               |
| <i>Monitor pharmacological therapy.</i>                                                                 |                         |          |                           |       |               |
| <i>Monitor non-pharmacological therapy.</i>                                                             |                         |          |                           |       |               |
| <i>Other (please, describe other relevant examples)</i>                                                 |                         |          |                           |       |               |
| <b>Do you consider that community pharmacies can provide new services for the following conditions:</b> |                         |          |                           |       |               |
| <i>In drug-supplement interaction.</i>                                                                  |                         |          |                           |       |               |
| <i>Other (please, describe other relevant examples)</i>                                                 |                         |          |                           |       |               |
| <b>Community pharmacies have the potential to include new services given:</b>                           |                         |          |                           |       |               |
| <i>The geographical proximity that pharmacies have with the community.</i>                              |                         |          |                           |       |               |
| <i>The proximity, in terms of relationship between pharmacy professional and patient/client.</i>        |                         |          |                           |       |               |
| <i>The existence of physical spaces.</i>                                                                |                         |          |                           |       |               |
| <i>The existence of human resources.</i>                                                                |                         |          |                           |       |               |
| <i>The availability of professionals.</i>                                                               |                         |          |                           |       |               |

|                                                                                                                      |  |  |  |  |  |
|----------------------------------------------------------------------------------------------------------------------|--|--|--|--|--|
| <i>The current knowledge of pharmacy professionals on drug-supplement interaction.</i>                               |  |  |  |  |  |
| <i>Other (please, describe other relevant potentialities)</i>                                                        |  |  |  |  |  |
| <b>The advantages of including these new services for you, as a pharmacy professional would be:</b>                  |  |  |  |  |  |
| <i>Improved adequacy of the services for the patient/client.</i>                                                     |  |  |  |  |  |
| <i>Better follow-up on the health state of the patient/client.</i>                                                   |  |  |  |  |  |
| <i>Further differentiation of pharmacy professionals</i>                                                             |  |  |  |  |  |
| <i>Better payment for new services provided.</i>                                                                     |  |  |  |  |  |
| <i>The possibility of working in a multidisciplinary team</i>                                                        |  |  |  |  |  |
| <i>Other (please, describe other advantages that you consider relevant)</i>                                          |  |  |  |  |  |
| <b>The advantages of including these new services for pharmacies would be:</b>                                       |  |  |  |  |  |
| <i>Increased perception of the utility of pharmacies by patients/clients, and the availability of more services.</i> |  |  |  |  |  |
| <i>Increased profits.</i>                                                                                            |  |  |  |  |  |
| <i>Prestige.</i>                                                                                                     |  |  |  |  |  |
| <i>Social function.</i>                                                                                              |  |  |  |  |  |
| <i>Resource optimization.</i>                                                                                        |  |  |  |  |  |
| <i>Increased competitiveness of pharmacies.</i>                                                                      |  |  |  |  |  |
| <i>Other (please, describe other advantages that you consider relevant)</i>                                          |  |  |  |  |  |
| <b>The advantages of including these new services for other healthcare professionals would be:</b>                   |  |  |  |  |  |
| <i>Reduced workload.</i>                                                                                             |  |  |  |  |  |
| <i>Increased intervention success.</i>                                                                               |  |  |  |  |  |
| <i>Assuring therapeutic follow-up.</i>                                                                               |  |  |  |  |  |
| <i>Gaining additional detailed information about the patient/client.</i>                                             |  |  |  |  |  |
| <i>Other (please, describe other advantages that you consider relevant)</i>                                          |  |  |  |  |  |
| <b>The advantages of including these new services for patients/clients would be:</b>                                 |  |  |  |  |  |
| <i>Reducing the number of trips to healthcare services</i>                                                           |  |  |  |  |  |

|                                                                                                       |  |  |  |  |  |
|-------------------------------------------------------------------------------------------------------|--|--|--|--|--|
| <i>Preventing the aggravation of the clinical condition</i>                                           |  |  |  |  |  |
| <i>Close relationship between patient/client and pharmacy professional</i>                            |  |  |  |  |  |
| <i>More confidence in the services provided.</i>                                                      |  |  |  |  |  |
| <i>Faster intervention.</i>                                                                           |  |  |  |  |  |
| <i>Optimizing patient/client time in accessing the pharmacy's service.</i>                            |  |  |  |  |  |
| <i>Other (please, describe other advantages that you consider relevant)</i>                           |  |  |  |  |  |
| <b>The role of the pharmacy in drug-supplement interaction would imply assessing:</b>                 |  |  |  |  |  |
| <i>Previously prescribed drugs.</i>                                                                   |  |  |  |  |  |
| <i>Supplement consumption.</i>                                                                        |  |  |  |  |  |
| <i>The risk of drug-supplement interactions that the patient/client plans to acquire.</i>             |  |  |  |  |  |
| <i>Glycaemia.</i>                                                                                     |  |  |  |  |  |
| <i>Cholesterol.</i>                                                                                   |  |  |  |  |  |
| <i>Triglycerides.</i>                                                                                 |  |  |  |  |  |
| <i>Weight/height.</i>                                                                                 |  |  |  |  |  |
| <i>Blood pressure.</i>                                                                                |  |  |  |  |  |
| <i>Other (please, describe other parameters that you consider relevant).</i>                          |  |  |  |  |  |
| <b>The role of pharmacies in non-pharmacological therapeutics involves/should involve monitoring:</b> |  |  |  |  |  |
| <i>Physical activity.</i>                                                                             |  |  |  |  |  |
| <i>Lifestyle.</i>                                                                                     |  |  |  |  |  |
| <i>Food diet.</i>                                                                                     |  |  |  |  |  |
| <i>Smoking cessation.</i>                                                                             |  |  |  |  |  |
| <i>Sleep hygiene.</i>                                                                                 |  |  |  |  |  |
| <i>Other (please, describe other parameters that you consider relevant).</i>                          |  |  |  |  |  |
| <b>The conditions for implementation of new services in pharmacies are/should be:</b>                 |  |  |  |  |  |
| <i>Clarifying legal requisites, namely about the data that can be shared.</i>                         |  |  |  |  |  |

|                                                                                                                                                                                                     |  |  |  |  |  |
|-----------------------------------------------------------------------------------------------------------------------------------------------------------------------------------------------------|--|--|--|--|--|
| <i>Pharmacy professionals' training, for example, more knowledge about medical conditions/pathologies.</i>                                                                                          |  |  |  |  |  |
| <i>Specialization of pharmacy professionals in new conditions to be considered, particularly in drug-supplement interaction.</i>                                                                    |  |  |  |  |  |
| <i>Recruitment of new specialized professionals for pharmacies.</i>                                                                                                                                 |  |  |  |  |  |
| <i>Adequate physical space/pharmacy facilities.</i>                                                                                                                                                 |  |  |  |  |  |
| <b>For drug-supplement interactions:</b>                                                                                                                                                            |  |  |  |  |  |
| <i>Adequate equipment and computer systems at pharmacies for drug-supplement interaction.</i>                                                                                                       |  |  |  |  |  |
| <i>Printer for printing a list of individual interactions to give patients/clients.</i>                                                                                                             |  |  |  |  |  |
| <i>Interface with access to the data collected by the pharmacy professional.</i>                                                                                                                    |  |  |  |  |  |
| <i>Data bank with drug-supplement interactions.</i>                                                                                                                                                 |  |  |  |  |  |
| <i>Interface for other healthcare professionals that do not work in a pharmacy.</i>                                                                                                                 |  |  |  |  |  |
| <i>Alerts for herb interactions for various healthcare professionals involved in the monitoring, such as doctors, nutritionists, and other pharmacy professionals, giving scientific knowledge.</i> |  |  |  |  |  |
| <i>Platform for sharing valid scientific information to support interaction alerts.</i>                                                                                                             |  |  |  |  |  |
| <i>Other (please, describe other parameters that you consider relevant).</i>                                                                                                                        |  |  |  |  |  |
| <b>The new services made available at community pharmacies, for drug-supplement interactions, should be financially supported by:</b>                                                               |  |  |  |  |  |
| The pharmaceutical industry.                                                                                                                                                                        |  |  |  |  |  |
| The pharmacy itself.                                                                                                                                                                                |  |  |  |  |  |
| The state.                                                                                                                                                                                          |  |  |  |  |  |
| Insurance companies.                                                                                                                                                                                |  |  |  |  |  |
| Patient/Client.                                                                                                                                                                                     |  |  |  |  |  |
| Other (please, describe other examples that you consider relevant).                                                                                                                                 |  |  |  |  |  |
| <b>The difficulties in implementing new services in pharmacies are/could be:</b>                                                                                                                    |  |  |  |  |  |
| <i>More workload for pharmacy professionals.</i>                                                                                                                                                    |  |  |  |  |  |

|                                                                                                                                            |  |  |  |  |  |
|--------------------------------------------------------------------------------------------------------------------------------------------|--|--|--|--|--|
| <i>More financial investment by the pharmacy.</i>                                                                                          |  |  |  |  |  |
| <i>More time investment by pharmacy professionals.</i>                                                                                     |  |  |  |  |  |
| <i>The sensitivity of the data managed, namely the sharing of information between pharmacy professionals and healthcare professionals.</i> |  |  |  |  |  |
| <i>The sensitivity of the data managed, namely the sharing of information between pharmacies.</i>                                          |  |  |  |  |  |
| <i>Lack of training about the use of new equipment.</i>                                                                                    |  |  |  |  |  |
| <i>Lack of training about how the new services work.</i>                                                                                   |  |  |  |  |  |
| <i>Lack of training for pharmacy professionals to act in drug-supplement interactions.</i>                                                 |  |  |  |  |  |
| <i>Lack of acceptance by patients/clients about possible drug-supplement interactions that they take or plans to take.</i>                 |  |  |  |  |  |
| <i>Absence of a regulatory entity for supplements.</i>                                                                                     |  |  |  |  |  |
| <i>No knowledge about the acquisition of drugs or supplements acquired in other spaces, or at other pharmacies</i>                         |  |  |  |  |  |
| <i>Other (please, describe other examples that you consider relevant).</i>                                                                 |  |  |  |  |  |
| <b>Do you consider that the use new services can/could be activated:</b>                                                                   |  |  |  |  |  |
| With the exacerbation of the problem.                                                                                                      |  |  |  |  |  |
| With the change in therapy.                                                                                                                |  |  |  |  |  |
| In the beginning of the therapy.                                                                                                           |  |  |  |  |  |
| On medication dispensing.                                                                                                                  |  |  |  |  |  |
| When there is a patient/client complaint.                                                                                                  |  |  |  |  |  |
| When an adverse reaction occurs.                                                                                                           |  |  |  |  |  |
| When the disease is not under control.                                                                                                     |  |  |  |  |  |
| With bad device use.                                                                                                                       |  |  |  |  |  |
| Other (please, describe other examples that you consider relevant).                                                                        |  |  |  |  |  |
| <b>Can promote patient/client adherence to the new service, like:</b>                                                                      |  |  |  |  |  |
| <i>Providing discounts for the new services.</i>                                                                                           |  |  |  |  |  |

|                                                                                                  |  |  |  |  |  |
|--------------------------------------------------------------------------------------------------|--|--|--|--|--|
| <i>The new services being free of charges.</i>                                                   |  |  |  |  |  |
| <i>Assuring the co-payment for the new services.</i>                                             |  |  |  |  |  |
| <i>Assuring the dissemination of the added value of the new services.</i>                        |  |  |  |  |  |
| <i>Assuring the confidentiality in sharing clinical information.</i>                             |  |  |  |  |  |
| <i>Other (please, describe other examples that you consider relevant).</i>                       |  |  |  |  |  |
| <b>How would you classify the adherence of the different stakeholders to these new services:</b> |  |  |  |  |  |
| <i>By pharmacy professionals.</i>                                                                |  |  |  |  |  |
| <i>By healthcare professionals, including doctors, nutritionists, among others.</i>              |  |  |  |  |  |
| <i>By patients/clients.</i>                                                                      |  |  |  |  |  |
| <i>Your personal adherence.</i>                                                                  |  |  |  |  |  |
| <i>In case you want to give a comment/suggestion, please, use this space.</i>                    |  |  |  |  |  |
